# Supplementary material for: The triglycerides-glucose index and the triglycerides to high-density lipoprotein cholesterol ratio are both effective predictors of in-hospital death in non-diabetic patients with AMI
Source: PeerJ. 2022 Nov 21;10:e14346. doi: 10.7717/peerj.14346 (PMC9686411; doi:10.7717/peerj.14346)
Supplement: Supplemental Information 2 [file peerj-10-14346-s002.xlsx]

## Sheet: Sheet1
Row name	Row name and Explaination	categorical
		0	1	2	3	4
	HBP	without HBP	with HBP
	Diabetes	without DM
	CKD	without CKD	with CKD
	killip grade	Killip 0	Killip I	Killip II	Killip III	Killip IV
	Gender		male	Female
	Death status	without death	with death
	Stopsmoking	No	Yes
	smoking	No smoking	smoking
	Alcohol	No	Yes
JY	anti-hypertension drugs	No	Yes
JZ	lipids-lowering drugs	No	Yes
	Aspirin	No	Yes
XSZ	nitrate	No	Yes
LNJ	diuretic	No	Yes
BZDJβ	Beta blockers	No	Yes
typeACS			NSTEMI	STEMI
